# Supplementary material
Source: PubMed Central journal article supplement (PMC5930254)

### Supplementary Table: Antibiotic spectrum classification

|                                                                                                                                                                                      |
|--------------------------------------------------------------------------------------------------------------------------------------------------------------------------------------|
| Narrow-spectrum                                                                                                                                                                      |
| First generation cephalosporins<br>Second generation cephalosporins<br>Tetracyclines<br>Sulfonamides                                                                                 |
| Broad-spectrum                                                                                                                                                                       |
| Fluoroquinolones<br>Third generation cephalosporins<br>$\beta$ -lactam/ $\beta$ -lactamase inhibitor combinations without anti-pseudomonal activity<br>Aminoglycosides<br>Macrolides |
| Extended-spectrum                                                                                                                                                                    |
| Vancomycin<br>Fourth generation cephalosporins<br>$\beta$ -lactam/ $\beta$ -lactamase inhibitor combinations with anti-pseudomonal activity<br>Ertapenem                             |
| Restricted                                                                                                                                                                           |
| Antipseudomonal carbapenems<br>Colistin<br>Linezolid                                                                                                                                 |

**Supplementary Figure: Frequency of antibiotic prescriptions per patient**

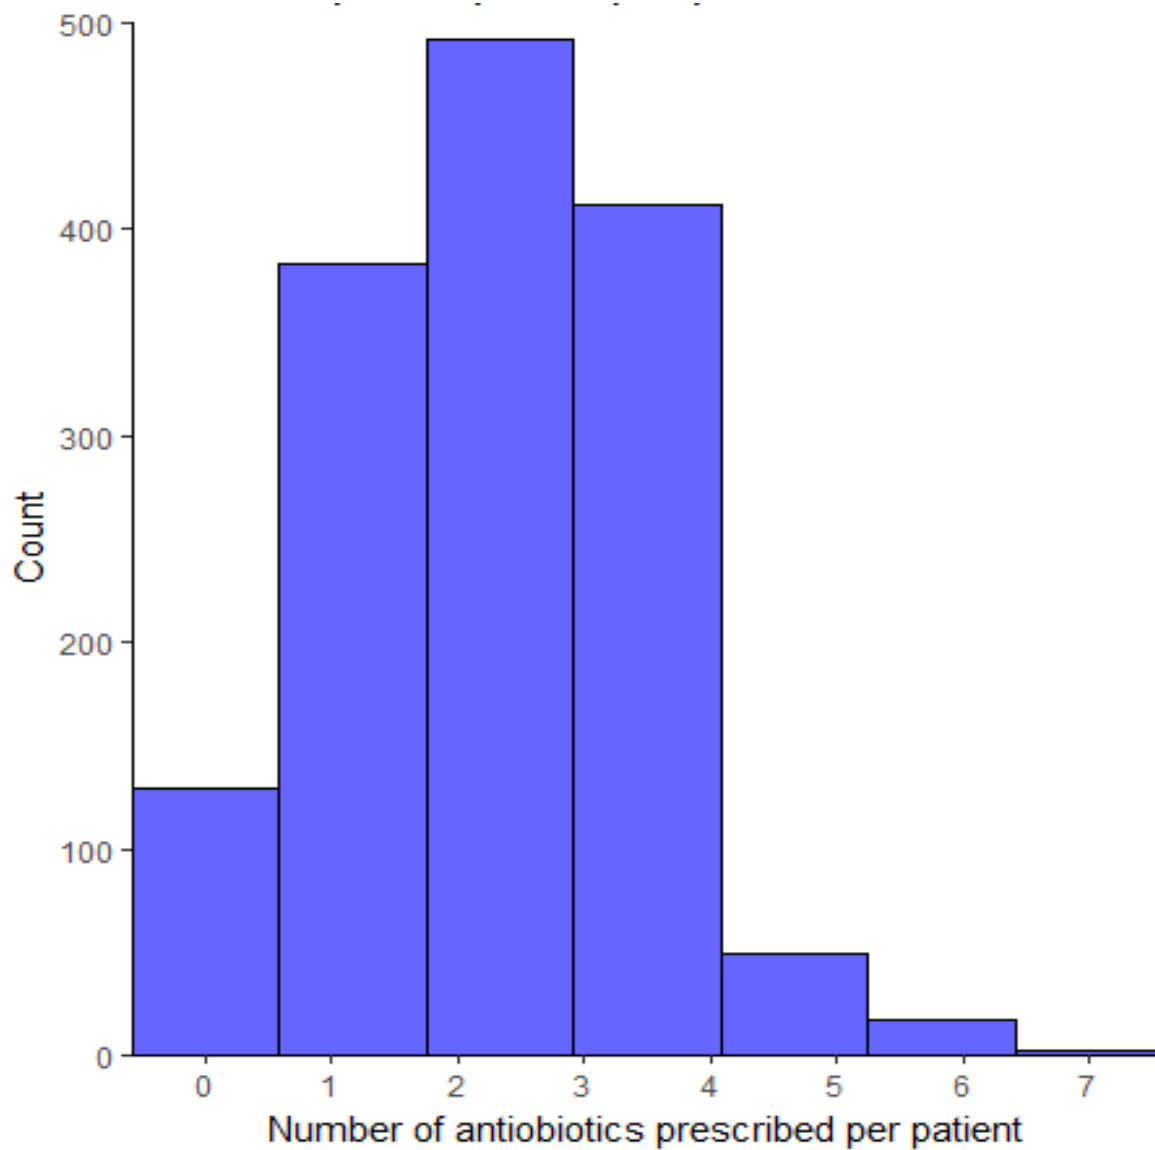

Supplement: cix1059_suppl_supplemental_data.pdf [file cix1059_suppl_supplemental_data.pdf]
